# Supplementary material for: Structural insights into dimerization and activation of the mGlu2–mGlu3 and mGlu2–mGlu4 heterodimers
Source: PubMed Central journal article supplement (PMC10543438; doi:10.1038/s41422-023-00830-2), 2023-06-08
Supplement: 41422_2023_830_MOESM1_ESM.pdf [file 41422_2023_830_MOESM1_ESM.pdf]

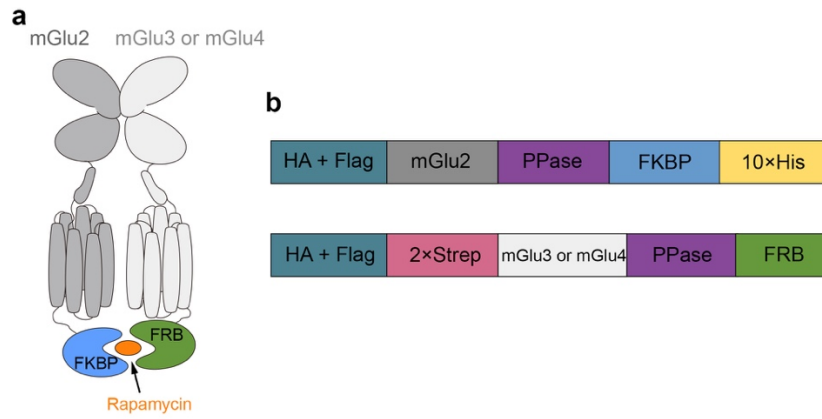

**Fig. S1 Construct design of mGlu2, mGlu3, and mGlu4.** **a** Schematic diagram of the heterodimerization. The FKBP and FRB fusion proteins at the C termini of mGlu2 and mGlu3 (or mGlu4), respectively, aid heterodimerization by acting as an interaction pair in the presence of rapamycin. **b** Construct design. PPase, PreScission protease site.
