# Supplementary material for: Structural insights into dimerization and activation of the mGlu2–mGlu3 and mGlu2–mGlu4 heterodimers
Source: PubMed Central journal article supplement (PMC10543438; doi:10.1038/s41422-023-00830-2), 2023-06-08
Supplement: 41422_2023_830_MOESM2_ESM.pdf [file 41422_2023_830_MOESM2_ESM.pdf]

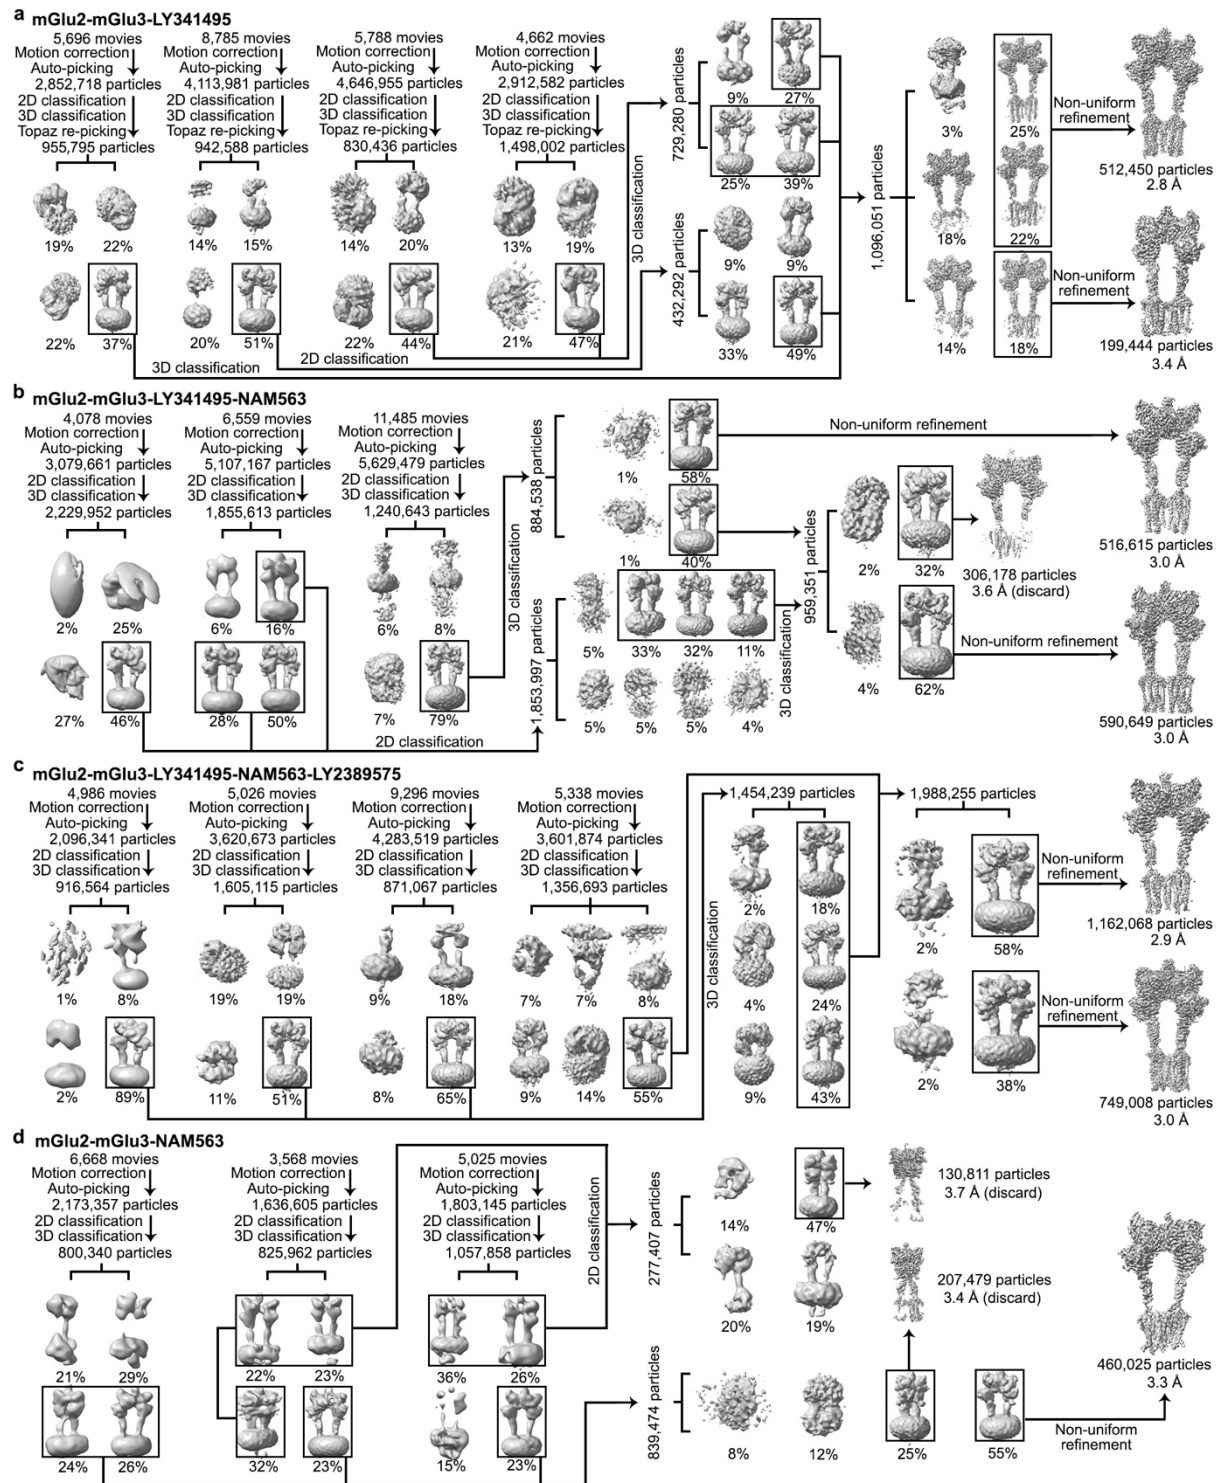

**Fig. S2 Cryo-EM workflow of the inactive mGlu2–mGlu3 heterodimers.** **a** The mGlu2–mGlu3 heterodimer in the presence of LY341495. **b** The mGlu2–mGlu3 heterodimer in the presence of LY341495 and NAM563. **c** The mGlu2–mGlu3 heterodimer in the presence

of LY341495, NAM563, and LY2389575. **d** The mGlu2–mGlu3 heterodimer in the presence of NAM563.
