# Supplementary material for: Structural insights into dimerization and activation of the mGlu2–mGlu3 and mGlu2–mGlu4 heterodimers
Source: PubMed Central journal article supplement (PMC10543438; doi:10.1038/s41422-023-00830-2), 2023-06-08
Supplement: 41422_2023_830_MOESM3_ESM.pdf [file 41422_2023_830_MOESM3_ESM.pdf]

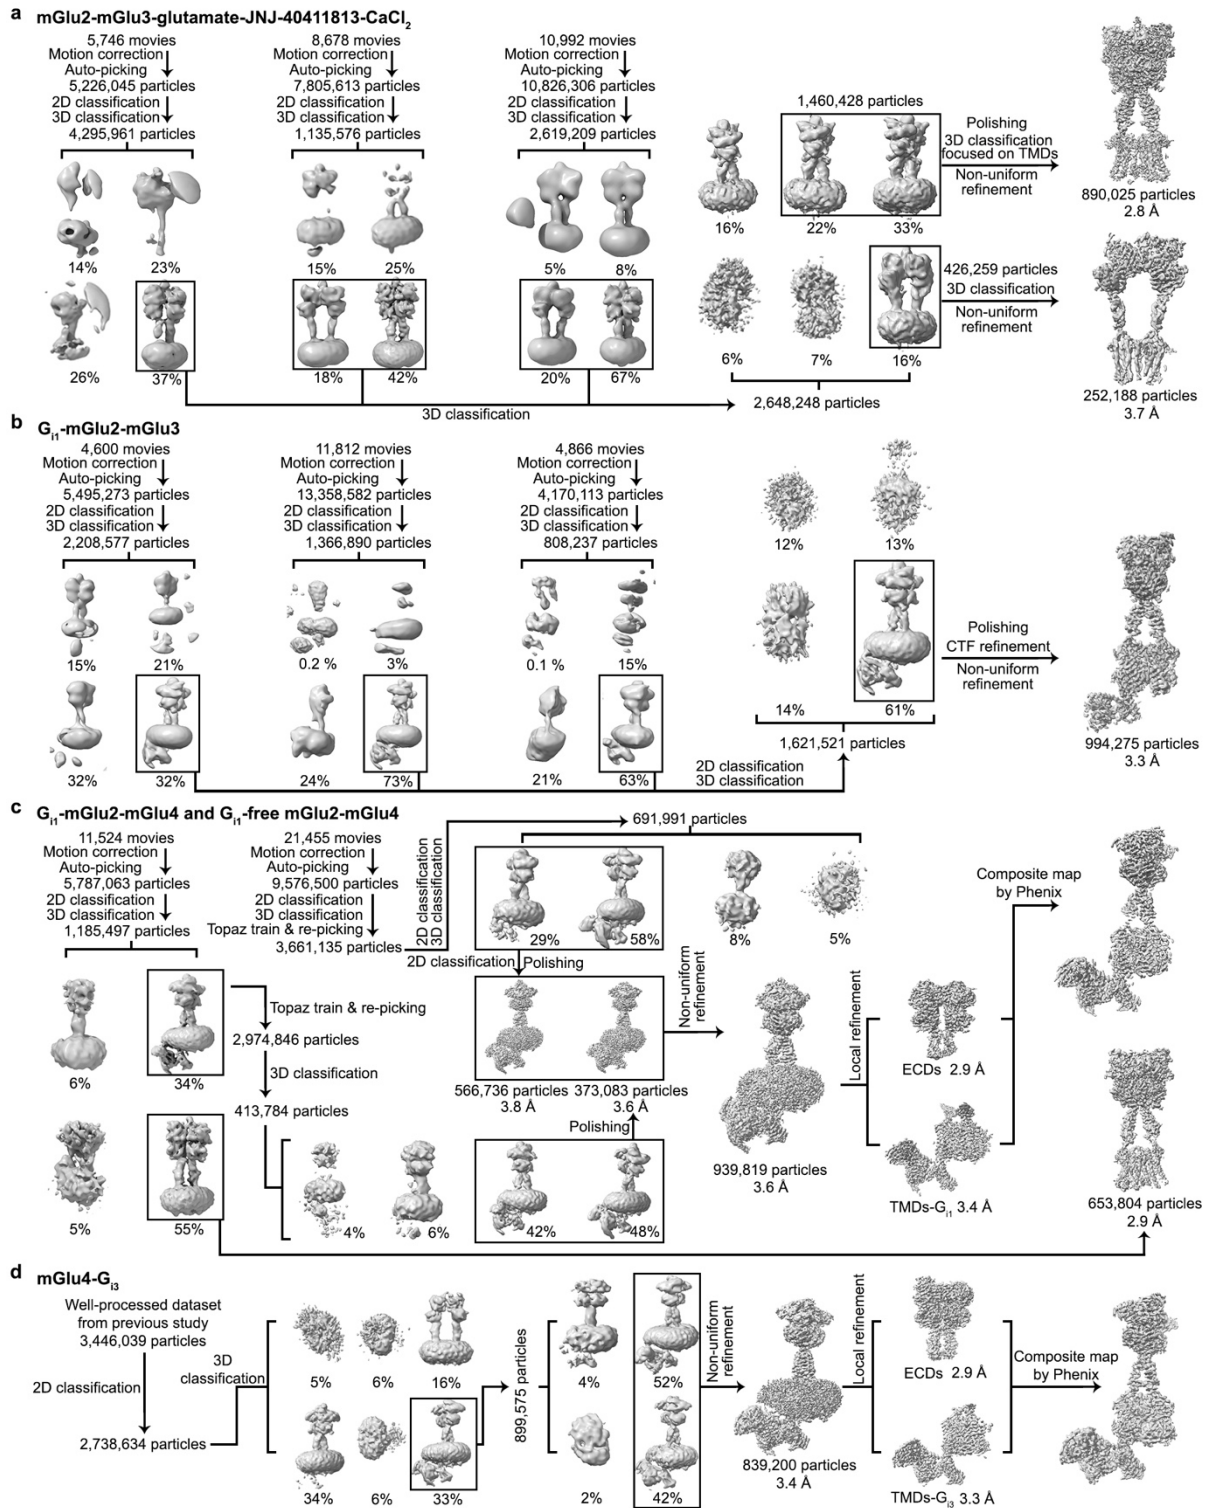

**Fig. S3 Cryo-EM workflow of the agonist-bound mGlu2-mGlu3 and mGlu2-mGlu4 heterodimers and mGlu4 homodimer.** **a** The mGlu2-mGlu3 heterodimer in the presence of glutamate, JNJ-40411813, and CaCl<sub>2</sub>. **b** The G<sub>i1</sub>-bound mGlu2-mGlu3 heterodimer. **c** The G<sub>i1</sub>-bound and G<sub>i1</sub>-free mGlu2-mGlu4 heterodimers. **d** The G<sub>i3</sub>-bound mGlu4 homodimer.
