# Supplementary material for: Structural insights into dimerization and activation of the mGlu2–mGlu3 and mGlu2–mGlu4 heterodimers
Source: PubMed Central journal article supplement (PMC10543438; doi:10.1038/s41422-023-00830-2), 2023-06-08
Supplement: 41422_2023_830_MOESM9_ESM.pdf [file 41422_2023_830_MOESM9_ESM.pdf]

**Table S1 Cryo-EM data collection, refinement and validation statistics**

|                                                     | mGlu2–mGlu3–<br>LY341495            |                                                                           | mGlu2–mGlu3–<br>LY341495–NAM563             |                                   | mGlu2–mGlu3–<br>LY341495–NAM563–<br>LY2389575 |                                                      |
|-----------------------------------------------------|-------------------------------------|---------------------------------------------------------------------------|---------------------------------------------|-----------------------------------|-----------------------------------------------|------------------------------------------------------|
| <b>Data collection and processing</b>               |                                     |                                                                           |                                             |                                   |                                               |                                                      |
| Magnification                                       | 81,000                              |                                                                           | 81,000                                      |                                   | 81,000                                        |                                                      |
| Voltage (kV)                                        | 300                                 |                                                                           | 300                                         |                                   | 300                                           |                                                      |
| Electron exposure (e <sup>-</sup> /Å <sup>2</sup> ) | 70                                  |                                                                           | 70                                          |                                   | 70                                            |                                                      |
| Defocus range (μm)                                  | -0.8 ~ -1.5                         |                                                                           | -0.8 ~ -1.5                                 |                                   | -0.8 ~ -1.5                                   |                                                      |
| Pixel size (Å)                                      | 1.071                               |                                                                           | 1.071                                       |                                   | 1.071                                         |                                                      |
| Symmetry imposed                                    | C1                                  |                                                                           | C1                                          |                                   | C1                                            |                                                      |
| Initial particle images (no.)                       | 14,526,236                          |                                                                           | 13,816,307                                  |                                   | 13,602,407                                    |                                                      |
|                                                     | <b>Mode I</b>                       | <b>Mode II</b>                                                            | <b>Mode I</b>                               | <b>Mode II</b>                    | <b>Mode I</b>                                 | <b>Mode III</b>                                      |
| Final particle images (no.)                         | 512,450                             | 199,444                                                                   | 516,615                                     | 590,649                           | 1,162,068                                     | 749,008                                              |
| Map resolution (Å)                                  | 2.8                                 | 3.4                                                                       | 3.0                                         | 3.0                               | 2.9                                           | 3.0                                                  |
| FSC threshold                                       | 0.143                               | 0.143                                                                     | 0.143                                       | 0.143                             | 0.143                                         | 0.143                                                |
| Map resolution range (Å)                            | 2.5–6.8                             | 3.2–6.8                                                                   | 2.8–6.8                                     | 2.9–6.8                           | 2.8–6.8                                       | 2.8–6.8                                              |
| <b>Refinement</b>                                   |                                     |                                                                           |                                             |                                   |                                               |                                                      |
| Initial model used (PDB code)                       | 7EPA, 7E9G, 5CNM                    |                                                                           | 7EPA, 7E9G, 5CNM                            |                                   | 7EPA, 7E9G, 5CNM                              |                                                      |
| Model resolution (Å)                                | 3.5                                 | 4.2                                                                       | 3.4                                         | 3.5                               | 3.4                                           | 3.5                                                  |
| FSC threshold                                       | 0.5                                 | 0.5                                                                       | 0.5                                         | 0.5                               | 0.5                                           | 0.5                                                  |
| Map sharpening <i>B</i> factor (Å <sup>2</sup> )    | -94                                 | -99                                                                       | -121                                        | -110                              | -120                                          | -113                                                 |
| Model composition                                   |                                     |                                                                           |                                             |                                   |                                               |                                                      |
| Non-hydrogen atoms                                  | 10,830                              | 10,667                                                                    | 10,771                                      | 10,617                            | 10,874                                        | 10,540                                               |
| Protein residues                                    | 1,527                               | 1,514                                                                     | 1,527                                       | 1,512                             | 1,525                                         | 1,504                                                |
| Ligands                                             | 2                                   | 2                                                                         | 2                                           | 2                                 | 2                                             | 2                                                    |
| <i>B</i> factors (Å <sup>2</sup> )                  |                                     |                                                                           |                                             |                                   |                                               |                                                      |
| Protein                                             | 100.90                              | 96.02                                                                     | 65.54                                       | 78.28                             | 30.29                                         | 47.11                                                |
| Ligands                                             | 51.49                               | 42.39                                                                     | 72.20                                       | 36.93                             | 52.31                                         | 27.74                                                |
| R.m.s. deviations                                   |                                     |                                                                           |                                             |                                   |                                               |                                                      |
| Bond lengths (Å)                                    | 0.002                               | 0.002                                                                     | 0.002                                       | 0.003                             | 0.002                                         | 0.002                                                |
| Bond angles (°)                                     | 0.502                               | 0.509                                                                     | 0.501                                       | 0.454                             | 0.451                                         | 0.497                                                |
| Validation                                          |                                     |                                                                           |                                             |                                   |                                               |                                                      |
| MolProbity score                                    | 1.56                                | 1.67                                                                      | 1.67                                        | 1.61                              | 1.60                                          | 1.78                                                 |
| Clashscore                                          | 5.20                                | 6.61                                                                      | 5.36                                        | 5.05                              | 5.71                                          | 8.81                                                 |
| Poor rotamers (%)                                   | 0.00                                | 0.00                                                                      | 0.11                                        | 0.00                              | 0.00                                          | 0.22                                                 |
| Ramachandran plot (%)                               |                                     |                                                                           |                                             |                                   |                                               |                                                      |
| Favored                                             | 95.91                               | 95.60                                                                     | 94.46                                       | 95.13                             | 95.77                                         | 95.56                                                |
| Allowed                                             | 4.09                                | 4.40                                                                      | 5.54                                        | 4.87                              | 4.23                                          | 4.44                                                 |
| Disallowed                                          | 0.00                                | 0.00                                                                      | 0.00                                        | 0.00                              | 0.00                                          | 0.00                                                 |
|                                                     | <b>mGlu2–<br/>mGlu3–<br/>NAM563</b> | <b>mGlu2–mGlu3–<br/>glutamate–<br/>JNJ-40411813–<br/>CaCl<sub>2</sub></b> | <b>G<sub>ii</sub>–<br/>mGlu2–<br/>mGlu3</b> | <b>G<sub>ii</sub>–mGlu2–mGlu4</b> | <b>mGlu4–G<sub>i3</sub></b>                   |                                                      |
| <b>Data collection and processing</b>               |                                     |                                                                           |                                             |                                   |                                               |                                                      |
| Magnification                                       | 81,000                              | 81,000                                                                    | 81,000                                      | 81,000                            | 81,000 <sup>a</sup>                           |                                                      |
| Voltage (kV)                                        | 300                                 | 300                                                                       | 300                                         | 300                               | 300 <sup>a</sup>                              |                                                      |
| Electron exposure (e <sup>-</sup> /Å <sup>2</sup> ) | 70                                  | 70                                                                        | 70                                          | 70                                | 70 <sup>a</sup>                               |                                                      |
| Defocus range (μm)                                  | -0.8 ~ -1.5                         | -0.8 ~ -1.5                                                               | -0.8 ~ -1.5                                 | -0.8 ~ -1.5                       | -0.8 ~ -1.5 <sup>a</sup>                      |                                                      |
| Pixel size (Å)                                      | 1.071                               | 1.071                                                                     | 1.071                                       | 1.071                             | 1.045 <sup>a</sup>                            |                                                      |
| Symmetry imposed                                    | C1                                  | C1                                                                        | C1                                          | C1                                | C1 <sup>a</sup>                               |                                                      |
| Initial particle images (no.)                       | 5,613,107                           | 23,857,964                                                                | 23,023,968                                  | 15,363,563                        | 16,656,316 <sup>a</sup>                       |                                                      |
|                                                     |                                     | <b>Rco<br/>state</b>                                                      | <b>Acc<br/>state</b>                        | <b>G<sub>ii</sub>–<br/>free</b>   | <b>G<sub>ii</sub>–<br/>bound</b>              |                                                      |
| Final particle images (no.)                         | 460,025                             | 252,188                                                                   | 890,025                                     | 994,275                           | 653,804                                       | 839,200                                              |
| Map resolution (Å)                                  | 3.3                                 | 3.7                                                                       | 2.8                                         | 3.3                               | 2.9                                           | 2.9<br>(ECDs),<br>3.4<br>(TMDs–<br>G <sub>ii</sub> ) |
| FSC threshold                                       | 0.143                               | 0.143                                                                     | 0.143                                       | 0.143                             | 0.143                                         | 0.143<br>(TMDs–<br>G <sub>i3</sub> )                 |
| Map resolution range (Å)                            | 3.1–6.8                             | 3.3–6.8                                                                   | 2.7–6.8                                     | 3.0–6.8                           | 2.6–6.8                                       | 2.8–6.8<br>2.9–6.8                                   |

**Refinement**

|                                                  |                        |                        |               |        |               |                                                     |                                                     |
|--------------------------------------------------|------------------------|------------------------|---------------|--------|---------------|-----------------------------------------------------|-----------------------------------------------------|
| Initial model used (PDB code)                    | 7EPA,<br>7E9G,<br>5CNM | 7EPA,<br>7E9G,<br>5CNM | 7EPB,<br>7E9G | 7E9G   | 7EPB,<br>7E9H | 7E9G,<br>7E9H                                       | 6N51,<br>6LML <sup>a</sup>                          |
| Model resolution (Å)                             | 3.7                    | 4.3                    | 3.1           | 3.5    | 3.3           | 4.3                                                 | 4.0                                                 |
| FSC threshold                                    | 0.5                    | 0.5                    | 0.5           | 0.5    | 0.5           | 0.5                                                 | 0.5                                                 |
| Map sharpening <i>B</i> factor (Å <sup>2</sup> ) | -126                   | -148                   | -100          | -124   | -113          | -88<br>(ECDs)<br>-92<br>(TMDs–<br>G <sub>i1</sub> ) | -97<br>(ECDs)<br>-90<br>(TMDs–<br>G <sub>i3</sub> ) |
| Model composition                                |                        |                        |               |        |               |                                                     |                                                     |
| Non-hydrogen atoms                               | 11,264                 | 10,766                 | 10,730        | 15,770 | 10,686        | 18,037                                              | 17,237                                              |
| Protein residues                                 | 1,531                  | 1,506                  | 1,499         | 2,146  | 1,492         | 2,387                                               | 2,317                                               |
| Ligands                                          | 2                      | 2                      | 2             | 3      | 2             | 4                                                   | 3                                                   |
| <i>B</i> factors (Å <sup>2</sup> )               |                        |                        |               |        |               |                                                     |                                                     |
| Protein                                          | 32.64                  | 50.69                  | 53.03         | 14.20  | 82.93         | 97.40                                               | 44.89                                               |
| Ligands                                          | 60.69                  | 88.54                  | 30.75         | 21.81  | 48.63         | 85.59                                               | 16.90                                               |
| R.m.s. deviations                                |                        |                        |               |        |               |                                                     |                                                     |
| Bond lengths (Å)                                 | 0.002                  | 0.002                  | 0.002         | 0.002  | 0.002         | 0.002                                               | 0.003                                               |
| Bond angles (°)                                  | 0.459                  | 0.483                  | 0.426         | 0.488  | 0.472         | 0.491                                               | 0.622                                               |
| Validation                                       |                        |                        |               |        |               |                                                     |                                                     |
| MolProbity score                                 | 1.61                   | 1.80                   | 1.54          | 1.61   | 1.55          | 1.81                                                | 1.98                                                |
| Clashscore                                       | 5.89                   | 6.47                   | 4.17          | 6.09   | 5.96          | 7.10                                                | 11.31                                               |
| Poor rotamers (%)                                | 0.10                   | 0.00                   | 0.20          | 0.00   | 0.00          | 0.00                                                | 0.17                                                |
| Ramachandran plot (%)                            |                        |                        |               |        |               |                                                     |                                                     |
| Favored                                          | 95.79                  | 93.21                  | 95.08         | 95.96  | 96.52         | 93.73                                               | 94.25                                               |
| Allowed                                          | 4.21                   | 6.79                   | 4.92          | 4.04   | 3.48          | 6.27                                                | 5.75                                                |
| Disallowed                                       | 0.00                   | 0.00                   | 0.00          | 0.00   | 0.00          | 0.00                                                | 0.00                                                |

<sup>a</sup>Data from previous study.<sup>15</sup>
