# Supplementary material for: Structural insights into dimerization and activation of the mGlu2–mGlu3 and mGlu2–mGlu4 heterodimers
Source: PubMed Central journal article supplement (PMC10543438; doi:10.1038/s41422-023-00830-2), 2023-06-08
Supplement: 41422_2023_830_MOESM10_ESM.pdf [file 41422_2023_830_MOESM10_ESM.pdf]

**Table S2 IP accumulation and G<sub>i</sub> activation assays of wild-type and mutant mGlu hetero- and homodimers**

| Basal activity of mGlu2–mGlu3 measured by IP accumulation assay |                             |                                     |                            |                               |                |                         |
|-----------------------------------------------------------------|-----------------------------|-------------------------------------|----------------------------|-------------------------------|----------------|-------------------------|
| WT/mutants                                                      | Basal activity <sup>a</sup> |                                     | n <sup>c</sup>             | Expression <sup>d</sup>       |                |                         |
|                                                                 | % of WT <sup>b</sup>        |                                     |                            | % of WT <sup>b</sup>          |                |                         |
| WT                                                              | 100                         |                                     | 23                         | 100                           |                |                         |
| WT+LY341495                                                     | 38 ± 3***                   |                                     | 7                          | /                             |                |                         |
| mGlu2                                                           | E604 <sup>2,37</sup> W      | 115 ± 7                             | 7                          | 99 ± 13                       |                |                         |
|                                                                 | G611 <sup>2,44</sup> W      | 135 ± 6*                            | 7                          | 94 ± 8                        |                |                         |
|                                                                 | L615 <sup>2,48</sup> W      | 130 ± 5                             | 8                          | 88 ± 10                       |                |                         |
|                                                                 | A630 <sup>3,27</sup> W      | 159 ± 11***                         | 7                          | 100 ± 14                      |                |                         |
|                                                                 | T633 <sup>3,30</sup> W      | 162 ± 15***                         | 6                          | 69 ± 11                       |                |                         |
|                                                                 | L637 <sup>3,34</sup> W      | 135 ± 7*                            | 7                          | 58 ± 6                        |                |                         |
|                                                                 | S678 <sup>4,31</sup> W      | 143 ± 7*                            | 7                          | 87 ± 18                       |                |                         |
|                                                                 | A681 <sup>4,34</sup> W      | 135 ± 8*                            | 7                          | 89 ± 20                       |                |                         |
|                                                                 | L684 <sup>4,37</sup> W      | 144 ± 7**                           | 8                          | 82 ± 8                        |                |                         |
|                                                                 | S688 <sup>4,41</sup> W      | 150 ± 15**                          | 6                          | 83 ± 17                       |                |                         |
|                                                                 | V695 <sup>4,48</sup> W      | 109 ± 13                            | 7                          | 78 ± 12                       |                |                         |
|                                                                 | V699 <sup>4,52</sup> W      | 153 ± 8***                          | 9                          | 82 ± 8                        |                |                         |
|                                                                 | mGlu3                       | F598 <sup>1,61</sup> A              | 141 ± 16*                  | 7                             | 73 ± 9         |                         |
| Y616 <sup>2,40</sup> A                                          |                             | 115 ± 7                             | 7                          | 124 ± 9                       |                |                         |
| F620 <sup>2,44</sup> A                                          |                             | 133 ± 10                            | 6                          | 127 ± 19                      |                |                         |
| L624 <sup>2,48</sup> W                                          |                             | 142 ± 9*                            | 7                          | 126 ± 11                      |                |                         |
| C627 <sup>2,51</sup> W                                          |                             | 149 ± 10**                          | 6                          | 122 ± 14                      |                |                         |
| F631 <sup>2,55</sup> A                                          |                             | 139 ± 11*                           | 7                          | 142 ± 11*                     |                |                         |
| V639 <sup>3,27</sup> W                                          |                             | 150 ± 13**                          | 5                          | 118 ± 14                      |                |                         |
| L643 <sup>3,31</sup> W                                          |                             | 144 ± 11**                          | 7                          | 127 ± 13                      |                |                         |
| L646 <sup>3,34</sup> W                                          |                             | 155 ± 11***                         | 8                          | 130 ± 8                       |                |                         |
| S650 <sup>3,38</sup> W                                          |                             | 138 ± 4*                            | 7                          | 106 ± 12                      |                |                         |
| V701 <sup>4,45</sup> W                                          |                             | 128 ± 7                             | 8                          | 103 ± 15                      |                |                         |
| S686 <sup>4,30</sup> W                                          |                             | 131 ± 13                            | 5                          | 114 ± 24                      |                |                         |
| F690 <sup>4,34</sup> A                                          |                             | 170 ± 7***                          | 5                          | 147 ± 16                      |                |                         |
| G694 <sup>4,38</sup> W                                          |                             | 163 ± 9***                          | 7                          | 100 ± 11                      |                |                         |
| Glutamate-induced G <sub>i</sub> activation of mGlu2–mGlu3      |                             |                                     |                            |                               |                |                         |
| WT/mutants <sup>g</sup>                                         | EC <sub>50</sub> (μM)       | EC <sub>50</sub> ratio <sup>d</sup> | pEC <sub>50</sub>          | E <sub>max</sub> <sup>f</sup> | n <sup>c</sup> | Expression <sup>d</sup> |
|                                                                 |                             |                                     | mean ± s.e.m. <sup>b</sup> | % of WT <sup>b</sup>          |                | % of WT <sup>b</sup>    |
| WT                                                              | 4.4                         | 1                                   | 5.36 ± 0.06                | 100 ± 3                       | 20             | 100                     |
| mGlu2 <sup>X</sup> –mGlu3                                       | 17                          | 4                                   | 4.76 ± 0.51                | 19 ± 4***                     | 10             | 56 ± 5*                 |
| mGlu2–mGlu3 <sup>X</sup>                                        | 4.5                         | 1                                   | 5.34 ± 0.02                | 97 ± 8                        | 8              | 97 ± 12                 |
| WT+NAM563                                                       | 19                          | 4                                   | 4.72 ± 0.21                | 90 ± 9                        | 4              | 100 ± 0                 |
| mGlu2 <sup>X</sup> –mGlu3+NAM563                                | 78                          | 18                                  | 4.11 ± 0.53                | 51 ± 15***                    | 4              | 58 ± 12                 |
| mGlu2 <sup>C121A</sup> –mGlu3 <sup>C127A</sup>                  | 2.5                         | 1                                   | 5.61 ± 0.27                | 81 ± 9                        | 8              | 125 ± 13                |
| mGlu2 <sup>C121A/V693C</sup> –mGlu3 <sup>C127A/Y743C</sup>      | 2.8                         | 1                                   | 5.56 ± 0.34                | 44 ± 6***                     | 10             | 77 ± 22                 |
| mGlu2 <sup>C121A/A726C</sup> –mGlu3 <sup>C127A/L709C</sup>      | 8.7                         | 2                                   | 5.06 ± 0.48                | 36 ± 8***                     | 5              | 106 ± 11                |
| mGlu2 <sup>C121A/V700C</sup> –mGlu3 <sup>C127A/S735C</sup>      | 6.2                         | 1                                   | 5.21 ± 0.44                | 42 ± 8***                     | 6              | 112 ± 17                |
| mGlu2 <sup>C121A/A630C</sup> –mGlu3 <sup>C127A/I708C</sup>      | 72                          | 16                                  | 4.14 ± 1.04                | 21 ± 12***                    | 3              | 65 ± 10                 |
| WT                                                              | 13                          | 1                                   | 4.90 ± 0.07                | 100 ± 3                       | 16             | 100                     |
| mGlu2 <sup>YADA</sup> –mGlu3                                    | 27                          | 2                                   | 4.57 ± 0.20                | 105 ± 9                       | 5              | 83 ± 7                  |
| mGlu2–mGlu3 <sup>YADA</sup>                                     | 122                         | 10                                  | 3.91 ± 0.31**              | 41 ± 6***                     | 4              | 90 ± 8                  |
| mGlu2 <sup>YADA</sup> –mGlu3 <sup>X</sup>                       | 26                          | 2                                   | 4.59 ± 0.26                | 70 ± 8*                       | 4              | 67 ± 10**               |



|                        |     |   |              |         |      |    |             |         |    |    |             |         |   |          |
|------------------------|-----|---|--------------|---------|------|----|-------------|---------|----|----|-------------|---------|---|----------|
| WT                     | 24  | 1 | 4.62 ± 0.11  | 100 ± 4 | 0.65 | 1  | 6.19 ± 0.08 | 100 ± 3 | 27 | 1  | 4.57 ± 0.13 | 100 ± 7 | 7 | 100      |
| I796 <sup>6.48</sup> A | 166 | 7 | 3.78 ± 0.19* | 80 ± 7  | nd   | nd | nd          | nd      | nd | nd | nd          | nd      | 5 | 115 ± 32 |
| A800 <sup>6.52</sup> W | 57  | 2 | 4.24 ± 0.21  | 76 ± 7  | nd   | nd | nd          | nd      | nd | nd | nd          | nd      | 7 | 29 ± 6*  |
| S825 <sup>7.35</sup> W | 83  | 3 | 4.08 ± 0.19  | 86 ± 8  | nd   | nd | nd          | nd      | nd | nd | nd          | nd      | 6 | 44 ± 4*  |

<sup>a</sup>The basal activity was calculated by subtracting the IP production measured in the control (G $\alpha_{q19}$ , EAAT1, and empty PTT5 vector) for the wild-type (WT) heterodimer and all the mutants, and is presented as percent of WT activity.

<sup>b</sup>Data are shown as mean ± s.e.m. from at least three independent experiments. nd (not determined) refers to data where a robust concentration response curve could not be established within the concentration range tested. \* $P < 0.05$ , \*\* $P < 0.001$ , \*\*\* $P < 0.0001$  by one-way ANOVA followed by Dunnett's post-test compared to the response of WT.

<sup>c</sup>Sample size, the number of independent experiments performed in technical duplicate.

<sup>d</sup>Protein expression levels of the constructs at the cell surface were determined in parallel by flow cytometry with an anti-Flag antibody (Sigma) and reported as percent compared to the WT from at least three independent measurements performed in duplicate.

<sup>e</sup>The EC<sub>50</sub> ratio (EC<sub>50</sub>(mutant)/EC<sub>50</sub>(WT)) represents the shift between the WT and mutant curves, and characterizes the effect of the mutations on G<sub>i</sub> activation.

<sup>f</sup>The maximal response is reported as a percentage of the maximal effect at the WT.

<sup>g</sup>The 'X' indicates that the G protein coupling of the subunit was blocked by introducing a mutation in ICL3 (mGlu2, F756S; mGlu3, F765S; mGlu4, F781S).
